# Supplementary material for: Daptomycin Plasma and CSF Levels in Patients with Healthcare-Associated Meningitis
Source: Springer Nature journal article supplement (doi:10.1007/s12028-018-0657-y), 2019-01-03

**Supplementary material Table 1**: Summary of results for model CMP1_Pi.

|  |  |  | Bootstrap (4000 samples) | |
| --- | --- | --- | --- | --- |
| Parameter | Median Value | RSE % | Median | 5%-95% CI |
| θ1 (L/h) | 0.57 | 4.8 | 0.87 | 0.81-0.94 |
| θ2 (L/Kg) | 0.19 | 5.9 | 0.19 | 0.17-0.20 |
| θ3 | 0.24 | 35.5 | 0.24 | 0.09-0.39 |
| ω1 | 0.22 | 32.3 | 0.22 | 0.15-0.28 |
| σpro | 0.32 | 13.6 | 0.32 | 0.28-0.35 |
| σadd | 2.65 | 36.9 | 2.60 | 1.69-3.41 |

**Supplementary material Table 2**: Summary of results for models CMP1-Br and CMP12-Br.

Notes: Model equations: CMPT1 CL1 (L/h) = θ1 (CRCL/80)θ3 exp(η1), V1 (L) = θ2 ∙ WT; CMPT2 CL2 (L/h) = θ4 exp(η2), V2 (L) = θ5, k12 (1/h) = θ6.

RSE%, relative standard error, i.e. standard error/mean x 100; CI, confidence interval; CMPT1 (plasma compartment), CMPT2 (CSF compartment).

|  |  |  |  | Bootstrap (4000 samples) | |
| --- | --- | --- | --- | --- | --- |
| CMPT | Parameter | Median Value | RSE % | Median | 5%-95% CI |
| 1 | θ1 (L/h) | 0.57 | 13.9 | 0.57 | 0.45-0.75 |
| 1 | θ2 (L/Kg) | 0.14 | 7.7 | 0.14 | 0.13-0.16 |
| 1 | θ3 | 0.61 | 26.9 | 0.61 | 0.24-1.00 |
| 2 | θ4 (L/h) | 0.20 | 34.5 | 0.18 | 0.01-0.23 |
| 2 | θ5 (L) | 2.03 | 38.8 | 1.36 | 0.57-83.10 |
| 2 | θ6 | 4.02e-4 | 39.8 | 3.69e-4 | 1.8e-5-4.67e-4 |
| 1 | ω1 | 0.30 | 36.2 | 0.26 | 0.17-0.36 |
| 2 | ω2 | 0.47 | 54.8 | 0.46 | 0.23-0.75 |
| 1 | σ1 | 0.28 | 26.9 | 0.27 | 0.21-0.33 |
| 2 | σ2 | 0.38 | 14.9 | 0.38 | 0.33-0.43 |

Notes: Model equations: CMPT1 CL1 (L/h) = θ1 (CRCL/80)θ3 exp(η1), V1 (L) = θ2 ∙ WT; CMPT2 CL2 (L/h) = θ4 exp(η2), V2 (L) = θ5, k12 (1/h) = θ6. RSE%, relative standard error, i.e. standard error/mean x 100; CI, confidence interval; CMPT1 (plasma compartment), CMPT2 (CSF compartment).

**Supplementary materials Table 3:** CSF characteristics of collected samples

| Patients |  | CSF-Colture | CSF-Protein | CSF-Glucose | CSF-WBC | CSF-Neutrophils | CSF-Lymphocyte | CSF-Color | CSF-Aspect |
| --- | --- | --- | --- | --- | --- | --- | --- | --- | --- |
| 1 |  |  |  |  |  |  |  |  |  |
|  | 1 | E.Fecalis | 350 | 1 | 256 | 99% |  | Torpid | Sediment present |
|  | 2 |  |  |  |  |  |  |  |  |
|  | 3 |  |  |  |  |  |  |  |  |
|  | 4 | E.Fecalis | 222 | 46 | 123 | 99% |  | Torpid | Sediment present |
|  | 5 |  |  |  |  |  |  |  |  |
|  | 6 |  |  |  |  |  |  |  |  |
|  | 7 | Negative | 68 | 99 | 100 | 99% |  | Slightly torpid | Sediment present |
| 2 |  |  |  |  |  |  |  |  |  |
|  | 1 | Negative | N/A | 24 | 3000 |  |  | hematic |  |
|  | 2 |  |  |  |  |  |  |  |  |
|  | 3 | Negative | 260 | 53 | 150 | 99% |  | Slighlty Hematic | Clear with hematic sediment |
| 3 |  |  |  |  |  |  |  |  |  |
|  | 1 | Negative | 215 | 22 | 86 | 99% |  | Torpid | Sediment present |
|  | 2 |  |  |  |  |  |  |  |  |
|  | 3 |  |  |  |  |  |  |  |  |
|  | 4 | Negative | 191 | 38 | 4 |  |  | No color | Clear |
|  | 5 | Negative |  |  |  |  |  |  |  |
| 4 |  |  |  |  |  |  |  |  |  |
|  | 1 | Negative | 350 | 65 | 604 | 75% | 25% | Hematic | Clear with hematic sediment |
|  | 2 |  | 108 | 56 | 520 |  |  | Hematic | Clear with hematic sediment |
|  | 3 |  |  |  |  |  |  |  |  |
|  | 4 |  |  |  |  |  |  |  |  |
|  | 5 | Negative | 92 | 59 | 1700 | 99% |  | Slightly hemaitc | Clear with scarce hematic sediment |
|  | 6 |  |  |  |  |  |  |  |  |
|  | 7 | Negative | 38 | 61 | 152 | 99% |  | Slightly Xantocromic | Clear with scarce hematic sediment |
| 5 |  | NA |  |  |  |  |  |  |  |
| 6 |  |  |  |  |  |  |  |  |  |
|  | 1 | Coagulase-Negative Staphylococci | 225 | 55 | 310 | 99% |  | pinkish | Clear with hematic sediment |
|  | 2 |  |  |  |  |  |  |  |  |
|  | 3 |  |  |  |  |  |  |  |  |
|  | 4 |  |  |  |  |  |  |  |  |
|  | 5 | Coagulase-Negative Staphylococci | 180 | 63 | 240 | 99% |  | pinkish | Clear with hematic sediment |
|  | 6 |  |  |  |  |  |  |  |  |
| 7 |  |  |  |  |  |  |  |  |  |
|  | 1 | Negative | 88 | 45 | 25 | 99% |  |  |  |
|  | 2 |  |  |  |  |  |  |  |  |
|  | 3 | Negative | 53 | 66 | 4 |  |  | pinkish | Clear with hematic sediment |
| 8 |  |  |  |  |  |  |  |  |  |
|  | 1 | MRSE | 161 | 35 | 180 | 50% | 45% | Xantocromic | Clear with hematic sediment |
|  | 2 |  |  |  |  |  |  |  |  |
|  | 3 |  |  |  |  |  |  |  |  |
|  | 4 |  |  |  |  |  |  |  |  |
|  | 5 |  |  |  |  |  |  |  |  |
|  | 6 |  |  |  |  |  |  |  |  |
|  | 7 | Negative | 1222 | 40 | 170 | 73% | 25% | Xantocromic | Clear with hematic sediment |
|  | 13 | Negative | 218 | 46 | 12 |  |  |  |  |
|  | 17 | Negative | 116 | 40 | 16 | 18% | 77% | Slightly xantocromic | Clear with hematic sediment |
|  | 20 | Negative | 134 | 50 | 76 |  |  |  |  |
|  | 25 | Negative | 143 | 41 | 44 |  |  |  |  |
| 9 |  |  |  |  |  |  |  |  |  |
|  | 1 |  |  |  |  |  |  |  |  |
|  | 2 |  |  |  |  |  |  |  |  |
|  | 3 | MRSE | 160 | 32 | 84 |  |  | Xantocromic | Clear with hematic sediment |
|  | 4 |  |  |  |  |  |  |  |  |
|  | 7 |  | 150 | 22 | 68 | 68% | 20% | Xantocromic | Clear with hematic sediment |
|  | 13 | MRSE | 220 | 20 | 36 |  |  |  |  |
|  | 21 | MRSE | 102 | 32 | 2 |  |  |  |  |
|  | 26 |  | 75 | 42 | 0 |  |  | Xantocromic | Clear with hematic sediment |
|  | 31 |  | 77 | 36 | 4 |  |  | Clear | Clear |

**Supplementary materials Figure 1**

**Figure 1**: Plot of concentration of plasma compartment (*C*1) for each patient versus time


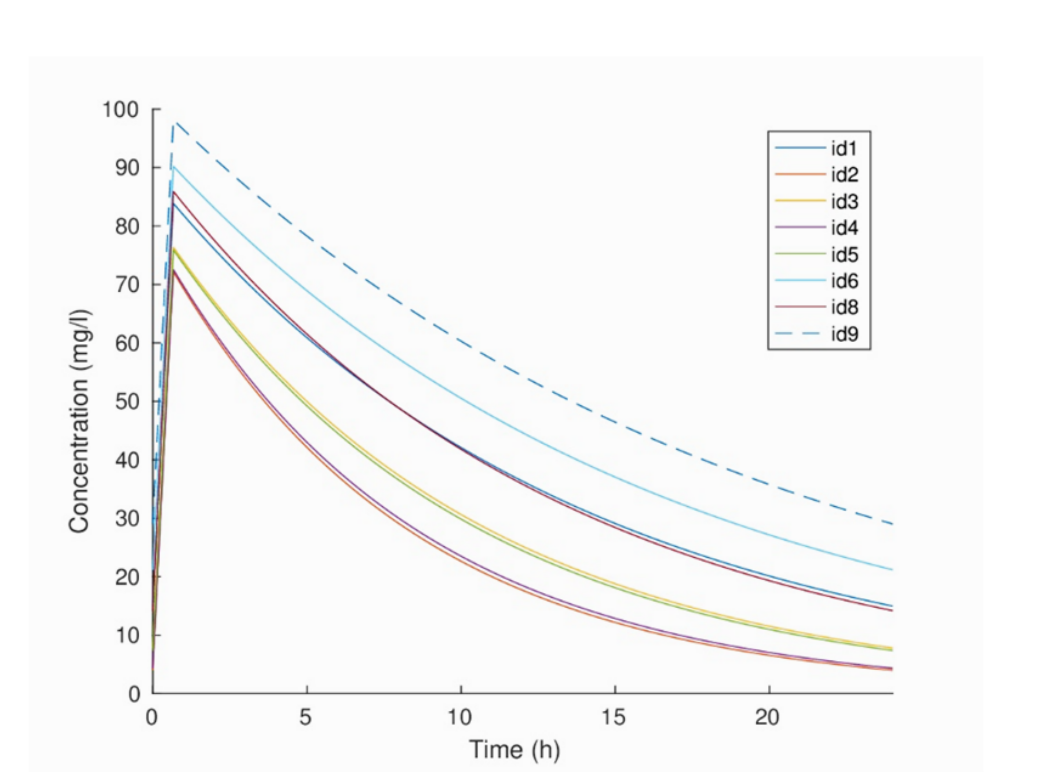


**Supplementary materials Figure 2**

**Figure 2**: Plot of concentration of CSF compartment (*C*2) for each patient versus time


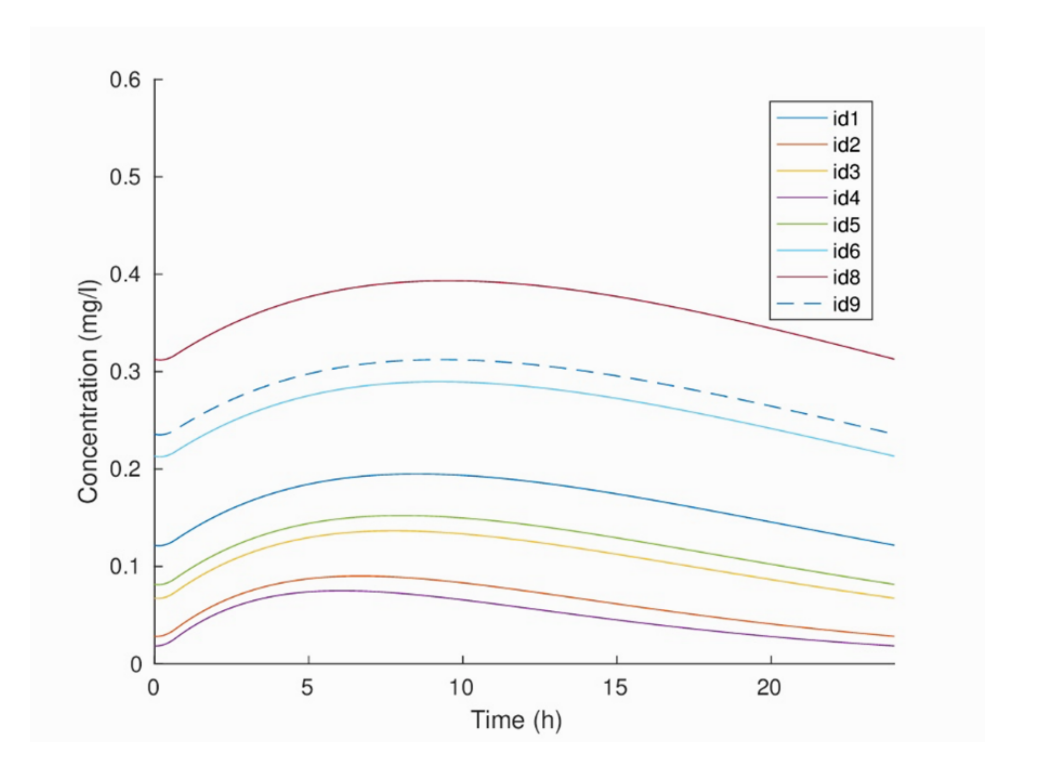

Supplement: MOESM1 [file 16373326]
